# Supplementary material
Source: PubMed Central journal article supplement (PMC1914208)

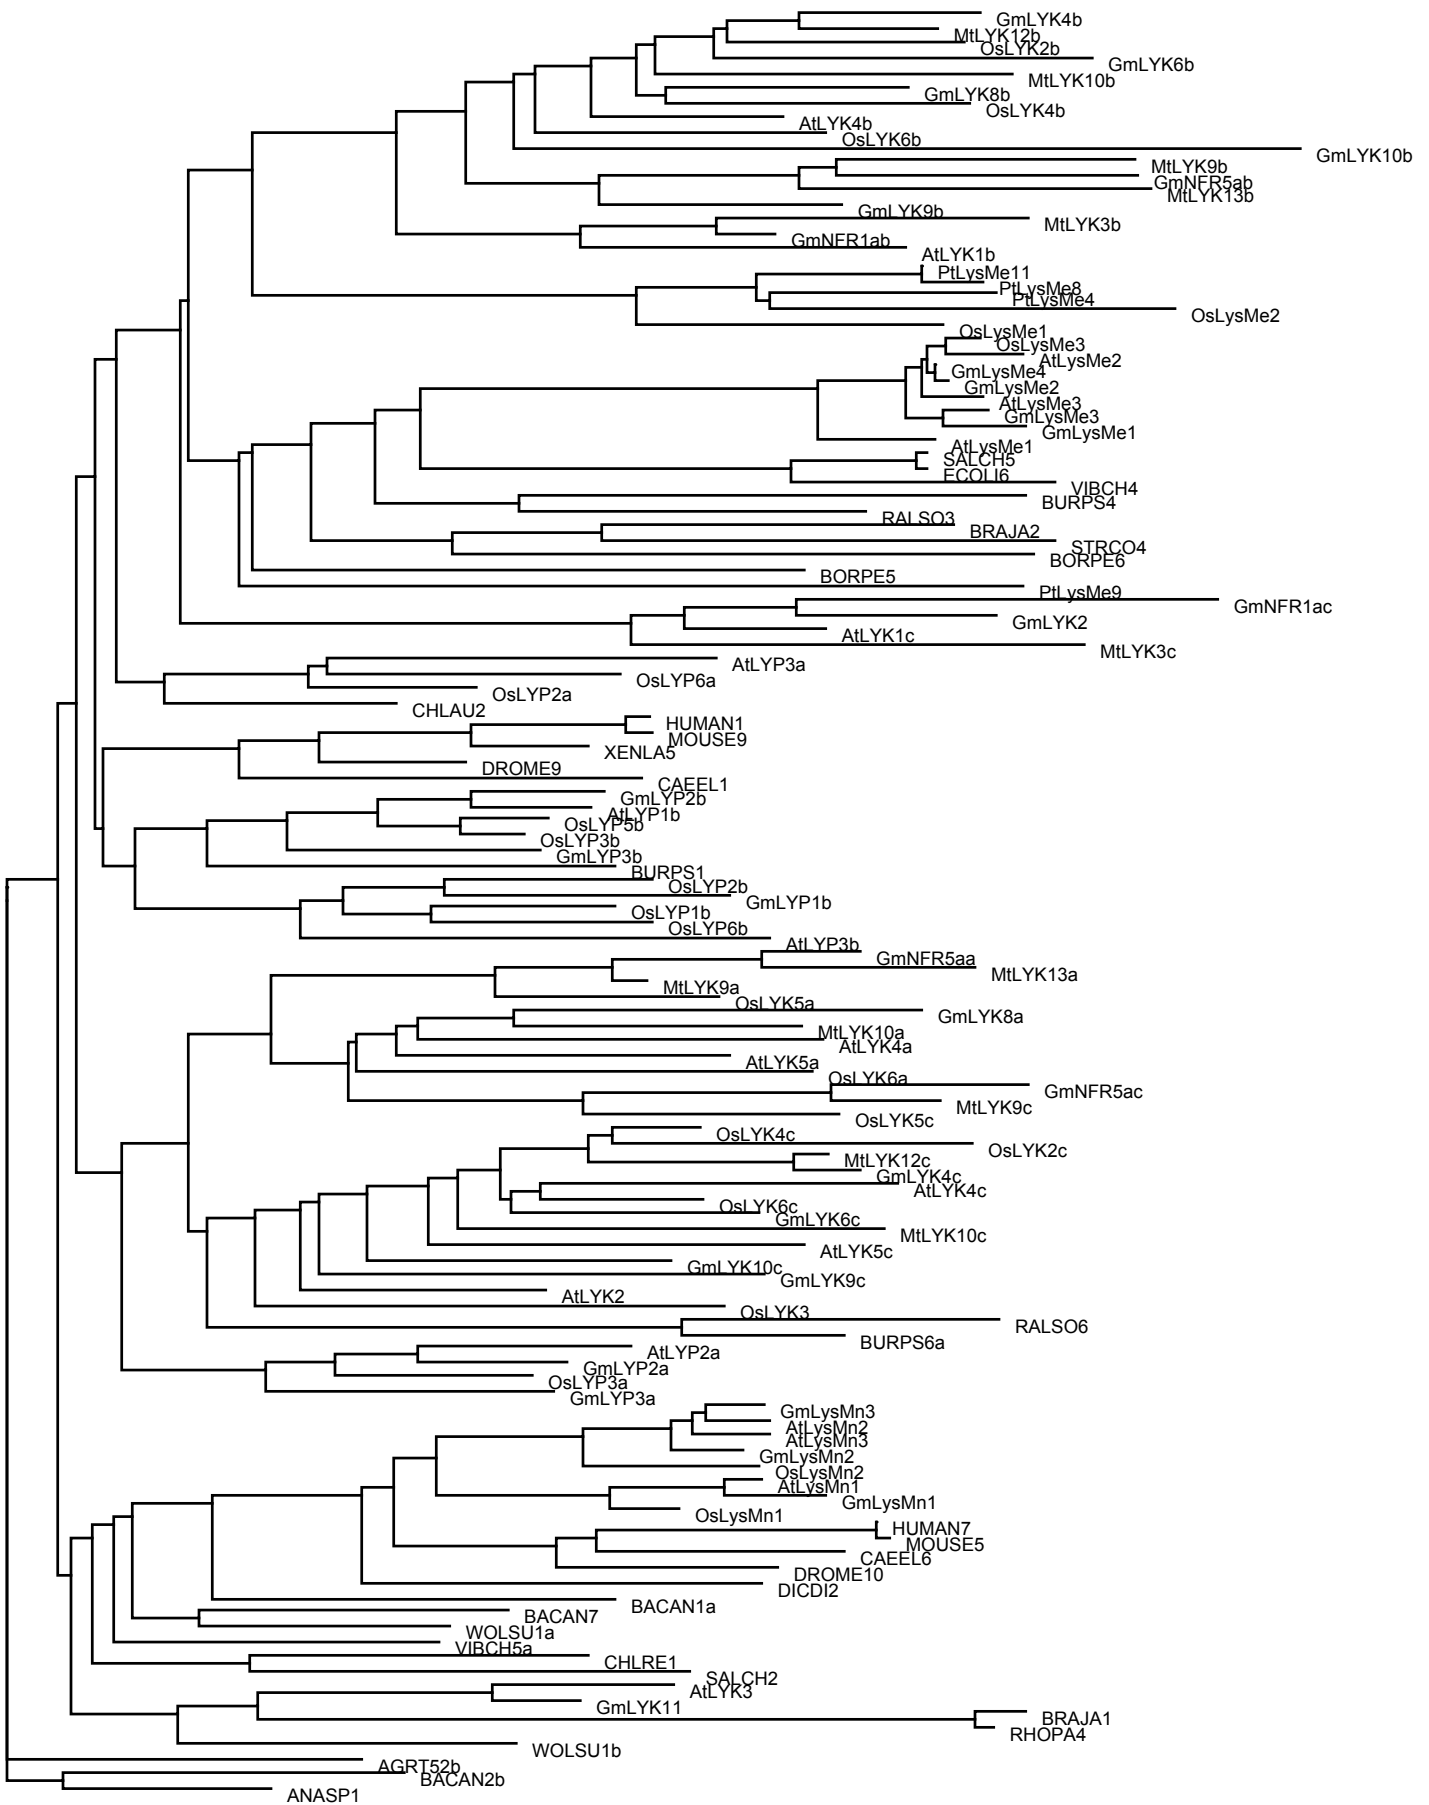

Supplement: plntphys_pp.107.097097_4.pdf [file plntphys_pp.107.097097_4.pdf]

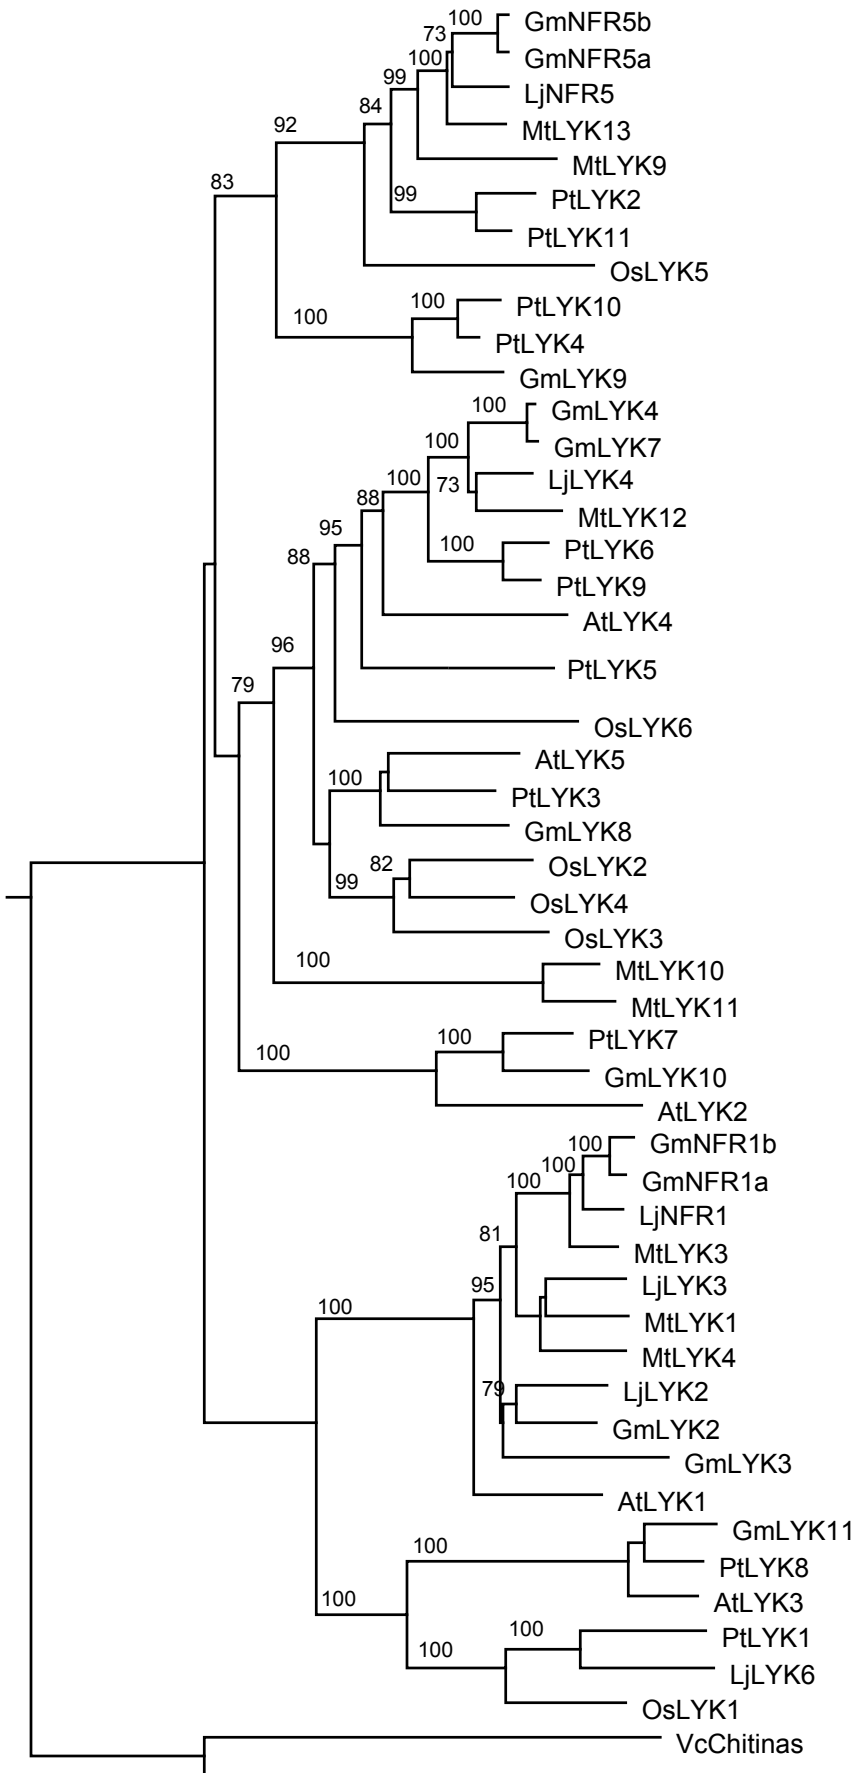

Supplement: plntphys_pp.107.097097_6.pdf [file plntphys_pp.107.097097_6.pdf]
